# Supplementary material for: Label-free miRNA fluorescent biosensors based on duplex-specific nucleases and silver nanoclusters
Source: Royal Society of Chemistry journal article supplement (doi:10.1039/d4an01407c), 2024-12-18
Supplement: d4an01407c1.pdf [file d4an01407c1.pdf]

## Supporting Information

### **Label-free miRNA fluorescent biosensor based on duplex-specific nucleases and silver nanoclusters**

Yuxin Zheng,<sup>1,2</sup> Qian Wang,<sup>1</sup> Zhiying Jin,<sup>2</sup> Tingting Zhang,<sup>1</sup> Jianshe Huang,<sup>\*,2</sup>

Jianshan Ye,<sup>\*,3</sup> Xiurong Yang<sup>\*,1,2</sup>

<sup>1</sup> School of Applied Chemistry and Engineering, University of Science and Technology of China, Hefei 230026, China

<sup>2</sup> State Key Laboratory of Electroanalytical Chemistry, Changchun Institute of Applied Chemistry, Chinese Academy of Science, Changchun 130022, China

<sup>3</sup> School of Chemistry and Chemical Engineering, South China University of Technology, Guangzhou 510641, China

\* Fax: +86 431 85689278. E-mail: xryang@ciac.ac.cn, jsye@scut.edu.cn, huangjs@ciac.ac.cn

## Table of contents

|                                                                                                                                                                  |     |
|------------------------------------------------------------------------------------------------------------------------------------------------------------------|-----|
| Table S1. Sequences of nucleic acid molecules used in this study .....                                                                                           | S-3 |
| Table S2. Comparison of the proposed biosensor with the previously reported methods for miRNA detection .....                                                    | S-4 |
| Figure S1. AFM images and corresponding height profiles of DNA-AgNCs .....                                                                                       | S-5 |
| Figure S2. The fluorescence emission spectra of the DNA-AgNCs at various excitation wavelengths .....                                                            | S-6 |
| Figure S3. The repeatability of the fluorescence excitation and emission spectra of DNA-AgNCs .....                                                              | S-6 |
| Figure S4. Fluorescence spectra of the reaction systems using hairpin DNA with different paired base numbers in the absence and presence of target miR-155 ..... | S-7 |
| References .....                                                                                                                                                 | S-8 |

**Table S1.** Sequences of nucleic acid molecules used in this study.

| Name     | Sequence (5'-3')                               |
|----------|------------------------------------------------|
| miR-155  | UUAAUGCUAAUCGUGAUAGGGGU                        |
| cDNA     | ACCCCTATCACGATTAGCATTAA                        |
| hp-13bp  | CGATTAGCATTAAACCCCCTTAATGCTAATCGTGATA<br>GGGGT |
| hp-11bp  | ATTAGCATTAAACCCCCTTAATGCTAATCGTGATAGG<br>GGT   |
| hp-9bp   | TAGCATTAAACCCCCTTAATGCTAATCGTGATAGGG<br>GT     |
| hp-7bp   | GCATTAACCCCCTTAATGCTAATCGTGATAGGGGT            |
| smiR-155 | UUAAUGCUAAUAGUGAUAGGGGU                        |
| tmiR-155 | UUAAUACUAAUAGUGAUCGGGGU                        |
| miR-21   | UAGCUUAUCAGACUGAUGUUGA                         |
| miR-499  | UUAAGACUUGCAGUGAUGUUU                          |
| miR-133a | AGCUGGUAAAAUGGAACCAAU                          |

**Table S2.** Comparison of the proposed biosensor with the previously reported methods for miRNA detection.

| Method          | Target  | Linear range     | LOD           | Reference |
|-----------------|---------|------------------|---------------|-----------|
| Fluorescence    | miR-21  | 20-160 nM        | 2.39 nM       | 1         |
| Fluorescence    | miR-21  | 2-400 nM         | 0.57 nM       | 2         |
| Fluorescence    | miR-223 | 0.05-0.6 $\mu$ M | 0.018 $\mu$ M | 3         |
| Fluorescence    | miR-362 | 20-200 nM        | 6.5 nM        | 4         |
| Phosphorescence | miR-21  | 8-80 nM          | 1.6 nM        | 5         |
| Colorimetry     | miR-141 | 0-100 nM         | 0.48 nM       | 6         |
| Fluorescence    | miR-155 | 1-600 nM         | 0.86 nM       | This work |

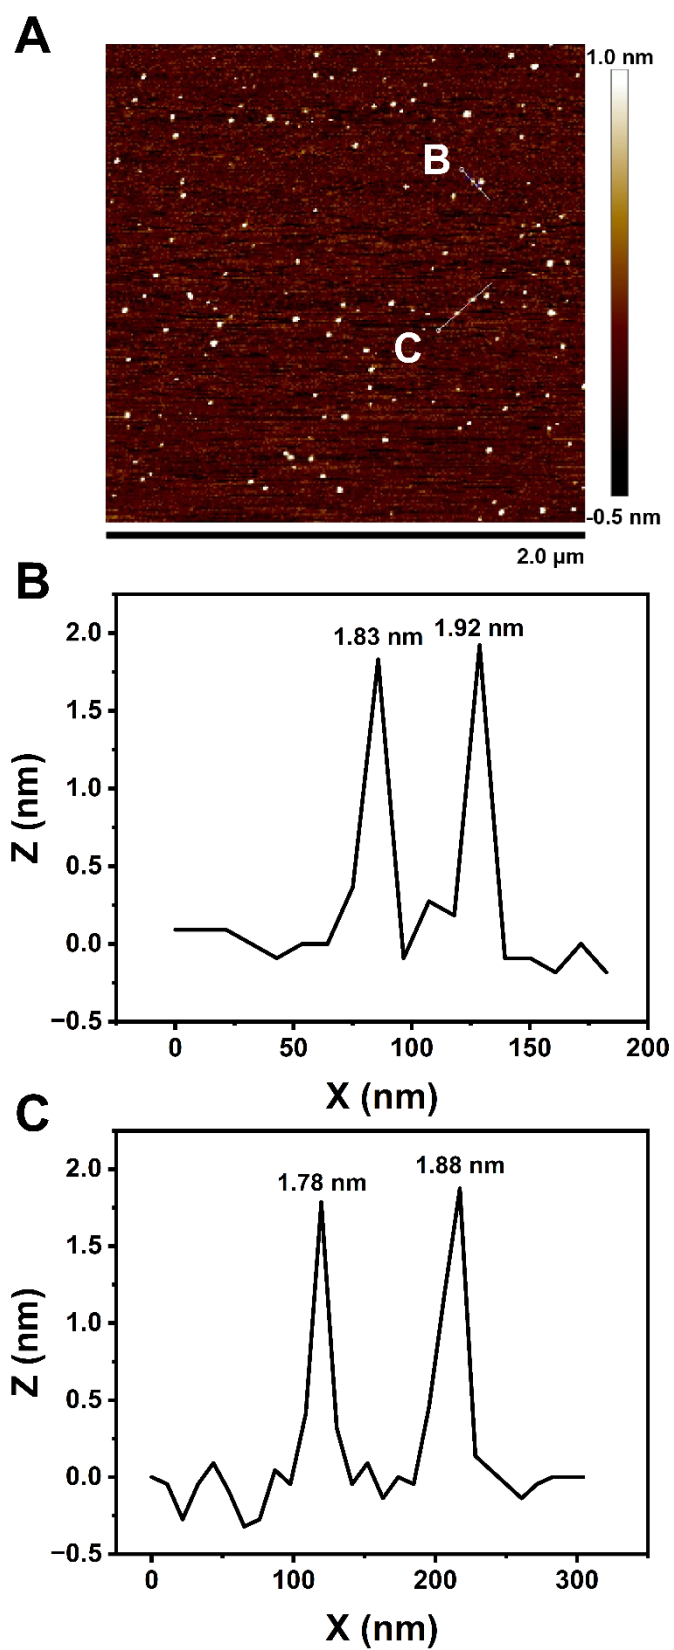

**Figure S1.** (A) AFM images and (B, C) corresponding height profiles of DNA-AgNCs.

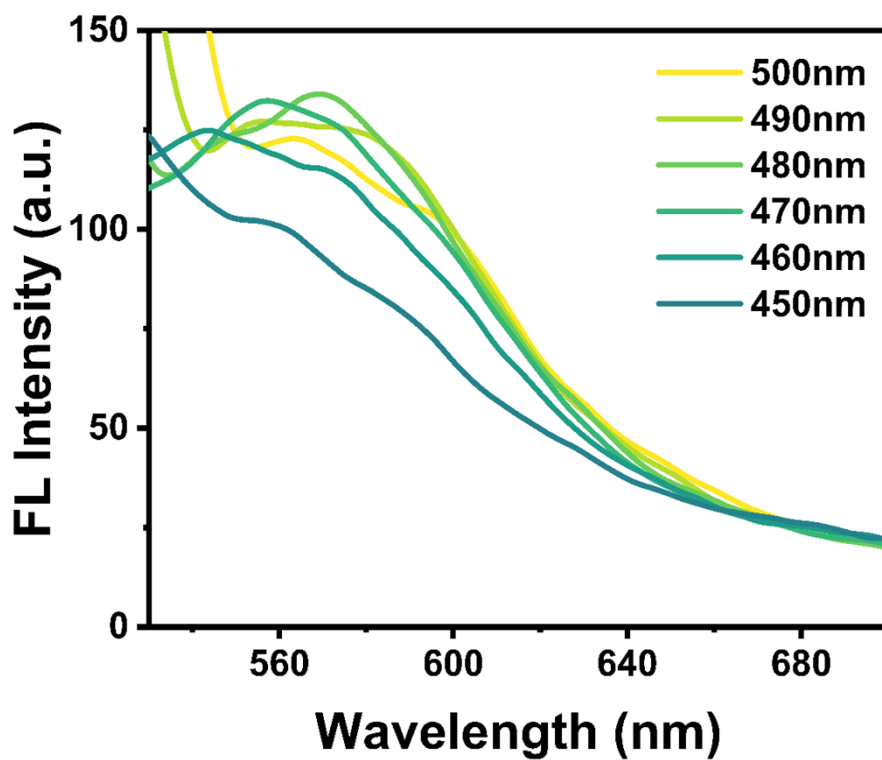

**Figure S2.** The fluorescence emission spectra of the DNA-AgNCs at various excitation wavelengths.

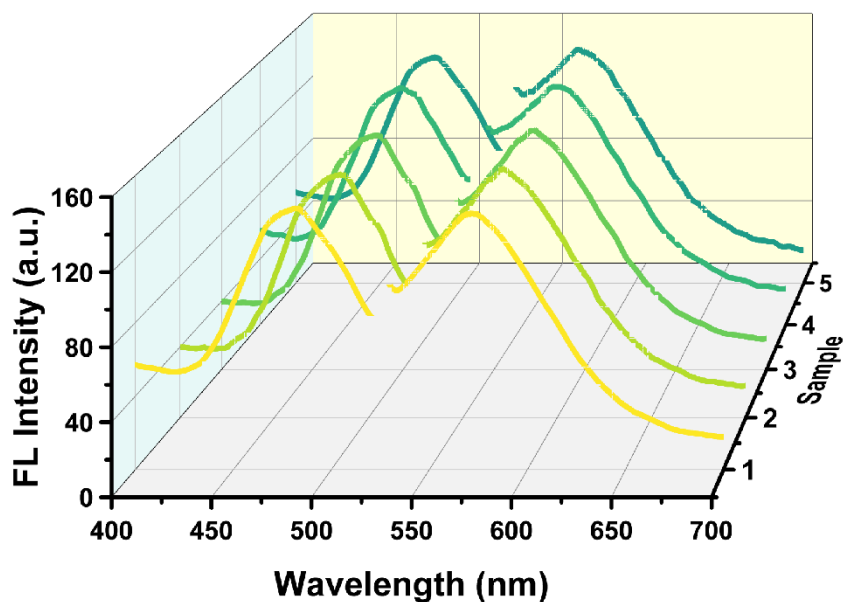

**Figure S3.** The repeatability of the fluorescence excitation and emission spectra of DNA-AgNCs.

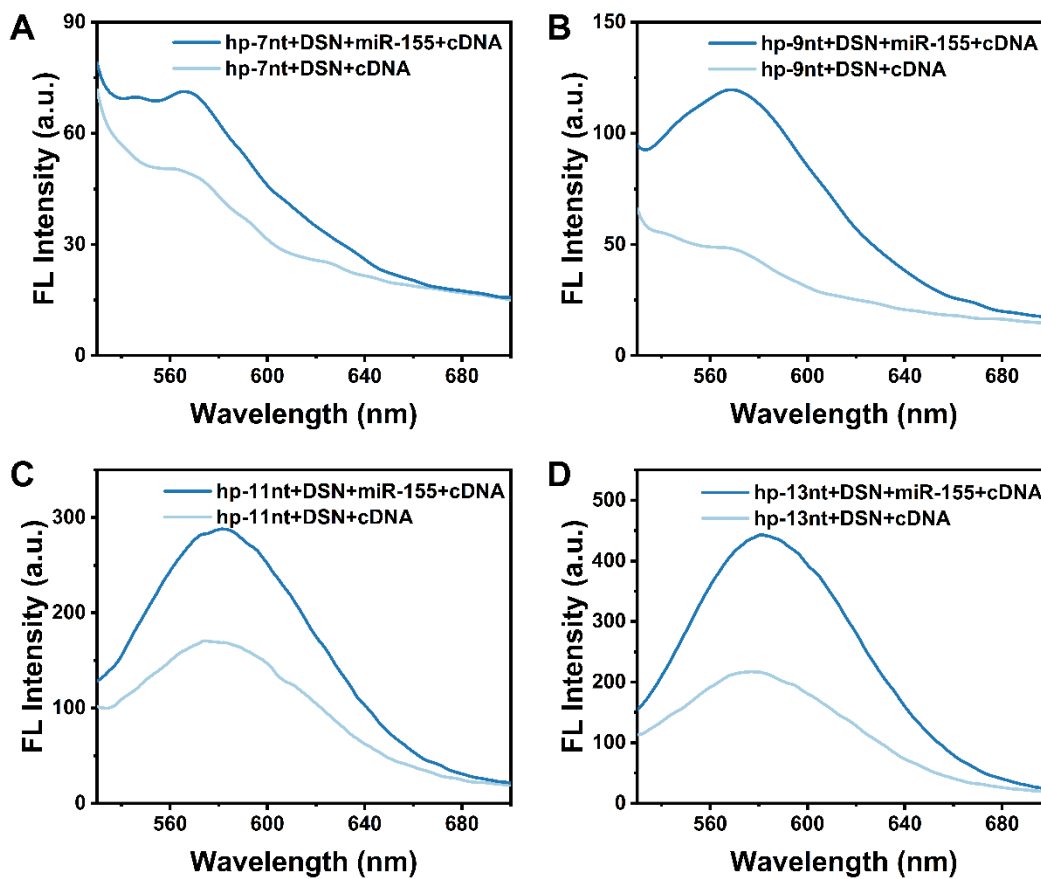

**Figure S4.** Fluorescence spectra of the reaction systems using hairpin DNA with different paired base numbers in the absence and presence of target miR-155 (500 nM).

## References

1. X. Li, S. Chen, Q. Liu, Y. Luo and X. Sun, *Chemical Communications*, 2021, **57**, 8039-8042.
2. X. Ji, Z. Wang, S. Niu and C. Ding, *Microchimica Acta*, 2020, **187**, 249.
3. B. Fang, P. Guo, M. Yang, Y. Ma, X. Yan, Z. Jia, W. Gao, S. Ahmad, C. Xu, C. Liu and M. Zhang, *Talanta*, 2020, **218**, 121122.
4. Z. Jia, K. Tu, Q. Xu, W. Gao, C. Liu, B. Fang and M. Zhang, *Analytica Chimica Acta*, 2021, **1175**, 338734.
5. J. Lv, Y. Miao and G. Yan, *RSC Advances*, 2017, **7**, 41063-41069.
6. Y. Park, C. Y. Lee, S. Kang, H. Kim, K. S. Park and H. G. Park, *Nanotechnology*, 2018, **29**, 085501.
